# Supplementary material for: Hydrogen-rich water ameliorates neuropathological impairments in a mouse model of Alzheimer's disease through reducing neuroinflammation and modulating intestinal microbiota
Source: PubMed Central journal article supplement — Neural Regen Res. 2021 Jul 8;17(2):409–17. doi: 10.4103/1673-5374.317992 (PMC8464006; doi:10.4103/1673-5374.317992), 2021-07-08
Supplement: NRR-17-409_Suppl1.pdf [file NRR-17-409_Suppl1.pdf]

|                                       |       |       |      |       |       |      |      |       |       |       |      |       |       |       |       |      |       |      |       |       |       |      |       |
|---------------------------------------|-------|-------|------|-------|-------|------|------|-------|-------|-------|------|-------|-------|-------|-------|------|-------|------|-------|-------|-------|------|-------|
| Unclassified                          | 6475  | 12660 | 8834 | 8215  | 12777 | 7703 | 9754 | 10027 | 14913 | 10378 | 9836 | 11013 | 10813 | 12535 | 12078 | 7225 | 14072 | 6412 | 6764  | 12234 | 16750 | 9426 | 11100 |
| Lachnospiraceae_NK4A136_group         | 10558 | 2394  | 8393 | 10514 | 5959  | 1215 | 7987 | 4526  | 1694  | 3302  | 5348 | 6063  | 770   | 2591  | 2980  | 3892 | 1681  | 920  | 11023 | 425   | 3104  | 5417 | 4811  |
| Helicobacter                          | 6600  | 485   | 462  | 552   | 195   | 5065 | 2396 | 736   | 518   | 2626  | 1079 | 2338  | 852   | 228   | 590   | 6289 | 1061  | 2058 | 768   | 1373  | 512   | 2351 | 1251  |
| Bacteroides                           | 413   | 689   | 1090 | 337   | 670   | 1275 | 218  | 1556  | 1456  | 651   | 1014 | 2093  | 2804  | 1210  | 663   | 397  | 3621  | 3582 | 1074  | 1887  | 241   | 282  | 372   |
| Alloprevotella                        | 55    | 115   | 397  | 291   | 1337  | 1610 | 458  | 1253  | 2612  | 886   | 953  | 270   | 3216  | 466   | 2182  | 1052 | 1355  | 272  | 1083  | 2628  | 330   | 554  | 621   |
| Prevotellaceae_UCG-001                | 295   | 2549  | 623  | 150   | 88    | 421  | 298  | 541   | 1125  | 384   | 216  | 94    | 3484  | 4     | 1490  | 157  | 3200  | 1283 | 1267  | 1742  | 129   | 216  | 225   |
| Desulfobrio                           | 1055  | 1160  | 520  | 386   | 388   | 24   | 998  | 1869  | 688   | 460   | 847  | 587   | 133   | 927   | 274   | 1903 | 307   | 989  | 1459  | 222   | 767   | 2418 | 902   |
| Ruminococcaceae_UCG-014               | 191   | 645   | 597  | 196   | 1179  | 4967 | 417  | 432   | 326   | 660   | 1109 | 21    | 754   | 181   | 331   | 16   | 8     | 945  | 139   | 3021  | 302   | 405  | 1056  |
| Lachnospiraceae_UCG-001               | 252   | 1455  | 1829 | 1015  | 57    | 81   | 385  | 1146  | 78    | 1589  | 12   | 1     | 634   | 5066  | 803   | 236  | 29    | 20   | 153   | 93    | 583   | 543  | 617   |
| Lactobacillus                         | 325   | 21    | 574  | 418   | 138   | 709  | 29   | 21    | 959   | 810   | 322  | 525   | 1815  | 550   | 2768  | 634  | 517   | 822  | 60    | 653   | 897   | 197  | 643   |
| Parasutella                           | 196   | 121   | 228  | 142   | 186   | 242  | 232  | 758   | 141   | 228   | 923  | 1379  | 452   | 165   | 130   | 826  | 700   | 408  | 128   | 1235  | 1037  | 483  | 422   |
| Mucospirillum                         | 182   | 130   | 88   | 146   | 18    | 5    | 159  | 244   | 127   | 349   | 161  | 368   | 11    | 74    | 37    | 3517 | 1092  | 199  | 732   | 45    | 38    | 1283 | 338   |
| Alistipes                             | 138   | 770   | 640  | 171   | 483   | 204  | 495  | 466   | 251   | 115   | 538  | 407   | 531   | 226   | 157   | 36   | 265   | 1219 | 213   | 1117  | 252   | 184  | 239   |
| Intestinimonas                        | 283   | 383   | 317  | 668   | 344   | 27   | 706  | 459   | 193   | 441   | 213  | 83    | 46    | 701   | 219   | 301  | 89    | 287  | 147   | 34    | 325   | 649  | 462   |
| Lachnospirillum                       | 125   | 668   | 176  | 516   | 537   | 60   | 257  | 599   | 401   | 378   | 146  | 110   | 57    | 660   | 302   | 164  | 65    | 161  | 1007  | 54    | 166   | 356  | 137   |
| Rikenella                             | 168   | 868   | 142  | 217   | 209   | 269  | 430  | 233   | 208   | 465   | 326  | 503   | 120   | 182   | 393   | 227  | 341   | 22   | 657   | 237   | 212   | 289  | 263   |
| Allobaculum                           | 159   | 46    | 27   | 488   | 94    | 1256 | 7    | 10    | 119   | 173   | 990  | 252   | 135   | 10    | 79    | 913  | 1     | 16   | 2     | 96    | 1210  | 84   | 82    |
| utbesuu                               | 52    | 100   | 191  | 82    | 45    | 33   | 528  | 171   | 51    | 905   | 293  | 64    | 86    | 538   | 940   | 277  | 42    | 162  | 242   | 30    | 224   | 326  | 501   |
| Anaerotruncus                         | 367   | 212   | 119  | 207   | 288   | 23   | 478  | 213   | 175   | 400   | 114  | 499   | 41    | 193   | 543   | 249  | 63    | 85   | 349   | 43    | 177   | 320  | 304   |
| Odoribacter                           | 137   | 384   | 55   | 137   | 338   | 8    | 654  | 93    | 244   | 193   | 364  | 511   | 44    | 11    | 62    | 312  | 216   | 27   | 958   | 66    | 214   | 63   | 93    |
| Turicibacter                          | 10    | 111   | 317  | 488   | 407   | 1031 | 1    | 0     | 0     | 11    | 432  | 33    | 69    | 312   | 362   | 28   | 3     | 153  | 0     | 62    | 393   | 27   | 40    |
| Candidatus_Saccharimonas              | 92    | 501   | 215  | 167   | 367   | 1094 | 307  | 44    | 323   | 201   | 412  | 1     | 16    | 93    | 101   | 5    | 2     | 29   | 18    | 139   | 2     | 26   | 112   |
| [Eubacterium]_xylinophilum_group      | 11    | 44    | 396  | 805   | 190   | 67   | 187  | 117   | 102   | 603   | 270  | 61    | 9     | 93    | 114   | 1    | 26    | 175  | 219   | 53    | 11    | 290  | 335   |
| Ruminiclostridium                     | 62    | 456   | 266  | 236   | 145   | 20   | 477  | 624   | 55    | 128   | 59   | 60    | 35    | 420   | 140   | 82   | 13    | 70   | 103   | 20    | 289   | 217  | 141   |
| Oscillator                            | 187   | 352   | 214  | 348   | 87    | 11   | 377  | 267   | 28    | 104   | 62   | 24    | 12    | 491   | 114   | 52   | 22    | 191  | 99    | 19    | 169   | 373  | 373   |
| Ruminococcus_1                        | 0     | 5     | 221  | 126   | 192   | 92   | 25   | 89    | 30    | 18    | 227  | 1     | 974   | 7     | 154   | 0    | 0     | 845  | 0     | 327   | 76    | 154  | 111   |
| Ruminiclostridium_5                   | 119   | 192   | 201  | 190   | 294   | 91   | 150  | 134   | 156   | 296   | 128  | 161   | 4     | 120   | 63    | 38   | 6     | 32   | 178   | 13    | 27    | 91   | 237   |
| Quinella                              | 177   | 223   | 230  | 200   | 382   | 28   | 9    | 561   | 369   | 250   | 276  | 196   | 0     | 0     | 0     | 0    | 0     | 0    | 0     | 0     | 0     | 0    | 0     |
| Coproccocus_1                         | 87    | 130   | 451  | 218   | 317   | 32   | 71   | 143   | 104   | 101   | 18   | 7     | 16    | 129   | 83    | 32   | 17    | 182  | 50    | 17    | 95    | 149  | 266   |
| [Eubacterium]_rumicantium_group       | 0     | 0     | 51   | 0     | 0     | 0    | 0    | 197   | 0     | 0     | 0    | 0     | 0     | 0     | 0     | 0    | 0     | 0    | 0     | 0     | 9     | 1    | 977   |
| [Eubacterium]_coprostanoligenes_group | 0     | 0     | 53   | 24    | 0     | 136  | 0    | 305   | 98    | 52    | 189  | 0     | 219   | 35    | 7     | 1    | 0     | 892  | 0     | 388   | 14    | 28   | 200   |
| Ruminiclostridium_6                   | 0     | 74    | 770  | 249   | 532   | 3    | 44   | 493   | 21    | 46    | 26   | 35    | 16    | 17    | 134   | 0    | 1     | 0    | 1     | 1     | 24    | 33   | 42    |
| Ruminiclostridium_9                   | 46    | 137   | 83   | 167   | 278   | 89   | 96   | 84    | 187   | 202   | 100  | 106   | 26    | 83    | 56    | 38   | 31    | 70   | 50    | 30    | 86    | 105  | 125   |
| Prevotellaceae_UCG-003                | 0     | 0     | 0    | 0     | 0     | 0    | 0    | 0     | 0     | 0     | 0    | 0     | 0     | 0     | 0     | 0    | 15    | 1907 | 0     | 0     | 0     | 0    | 242   |
| Anaerostipes                          | 0     | 0     | 0    | 0     | 0     | 0    | 5    | 392   | 0     | 249   | 355  | 0     | 0     | 0     | 0     | 0    | 1     | 1073 | 0     | 0     | 0     | 0    | 0     |
| Tyzzerella_3                          | 20    | 45    | 68   | 70    | 23    | 75   | 156  | 144   | 1     | 288   | 23   | 220   | 9     | 96    | 1     | 102  | 35    | 9    | 2     | 10    | 13    | 264  | 314   |
| Rikenellaceae_RC9_gut_group           | 34    | 96    | 11   | 15    | 76    | 23   | 19   | 32    | 78    | 14    | 35   | 44    | 414   | 25    | 66    | 20   | 63    | 152  | 91    | 361   | 19    | 56   | 29    |
| Ruminococcaceae_UCG-013               | 12    | 36    | 65   | 21    | 88    | 100  | 39   | 63    | 21    | 74    | 253  | 468   | 14    | 7     | 4     | 0    | 1     | 12   | 5     | 149   | 15    | 99   | 137   |
| Clostridium_sensu_stricto_1           | 12    | 93    | 17   | 34    | 11    | 30   | 124  | 38    | 3     | 160   | 933  | 8     | 5     | 47    | 1     | 2    | 8     | 88   | 22    | 1     | 1     | 10   | 10    |
| Butyrivibrio                          | 195   | 74    | 20   | 145   | 0     | 5    | 123  | 47    | 7     | 59    | 52   | 59    | 16    | 101   | 43    | 65   | 19    | 7    | 47    | 6     | 116   | 191  | 184   |
| Parabacteroides                       | 29    | 28    | 37   | 35    | 8     | 12   | 17   | 34    | 32    | 4     | 127  | 35    | 232   | 22    | 23    | 42   | 210   | 122  | 150   | 232   | 56    | 66   | 23    |
| Blautia                               | 38    | 6     | 5    | 16    | 49    | 17   | 14   | 0     | 5     | 27    | 3    | 14    | 0     | 41    | 405   | 4    | 2     | 812  | 2     | 0     | 1     | 7    | 3     |
| Streptococcus                         | 14    | 47    | 91   | 131   | 28    | 493  | 21   | 11    | 152   | 185   | 72   | 84    | 22    | 7     | 3     | 4    | 0     | 10   | 2     | 15    | 2     | 2    | 6     |
| Bifidobacterium                       | 64    | 3     | 15   | 49    | 44    | 92   | 4    | 0     | 36    | 30    | 41   | 0     | 188   | 10    | 206   | 70   | 16    | 7    | 0     | 85    | 182   | 38   | 68    |
| veinlieni                             | 3     | 237   | 2    | 156   | 19    | 341  | 38   | 61    | 157   | 118   | 13   | 64    | 15    | 0     | 0     | 0    | 0     | 0    | 0     | 0     | 0     | 0    | 0     |
| Ruminococcaceae_UCG-005               | 2     | 6     | 17   | 5     | 2     | 28   | 7    | 5     | 15    | 17    | 10   | 11    | 0     | 0     | 1     | 1    | 0     | 956  | 0     | 5     | 1     | 18   | 17    |
| [Eubacterium]_fissicatena_group       | 16    | 0     | 120  | 0     | 0     | 4    | 0    | 16    | 288   | 108   | 0    | 0     | 0     | 0     | 0     | 0    | 0     | 458  | 0     | 0     | 0     | 0    | 0     |
| Akkermansia                           | 2     | 3     | 34   | 14    | 197   | 75   | 5    | 4     | 4     | 11    | 0    | 0     | 62    | 1     | 0     | 62   | 0     | 25   | 0     | 170   | 34    | 183  | 107   |
| Acetatifactor                         | 4     | 164   | 21   | 112   | 13    | 0    | 15   | 14    | 2     | 10    | 7    | 1     | 0     | 295   | 45    | 0    | 0     | 0    | 1     | 6     | 17    | 35   | 176   |
| Ruminococcaceae_UCG-004               | 38    | 15    | 35   | 72    | 94    | 16   | 32   | 36    | 30    | 132   | 32   | 98    | 1     | 29    | 27    | 5    | 7     | 26   | 37    | 8     | 12    | 33   | 76    |
| Faecalibaculum                        | 23    | 2     | 4    | 69    | 36    | 132  | 1    | 0     | 5     | 13    | 50   | 70    | 69    | 8     | 42    | 0    | 1     | 19   | 1     | 26    | 287   | 6    | 8     |
| Lachnospiraceae_UCG-006               | 24    | 17    | 47   | 157   | 93    | 8    | 27   | 2     | 59    | 151   | 47   | 32    | 2     | 21    | 40    | 20   | 3     | 2    | 12    | 6     | 5     | 28   | 20    |
| Ruminococcaceae_UCG-009               | 71    | 82    | 12   | 110   | 16    | 9    | 68   | 25    | 1     | 41    | 16   | 3     | 3     | 78    | 29    | 11   | 2     | 7    | 63    | 4     | 35    | 73   | 41    |
| Anaeroplasma                          | 34    | 409   | 0    | 0     | 0     | 4    | 4    | 0     | 52    | 0     | 1    | 157   | 0     | 1     | 0     | 0    | 8     | 0    | 0     | 0     | 0     | 0    | 26    |
| Yersinia                              | 58    | 93    | 3    | 143   | 43    | 3    | 43   | 37    | 64    | 43    | 3    | 9     | 0     | 41    | 29    | 47   | 9     | 4    | 6     | 3     | 7     | 22   | 48    |
| Sutterella                            | 0     | 2     | 8    | 3     | 2     | 39   | 0    | 33    | 624   | 29    | 0    | 0     | 0     | 0     | 0     | 0    | 0     | 0    | 0     | 0     | 0     | 0    | 0     |
| Coriobacteriaceae_UCG-007             | 25    | 3     | 21   | 21    | 95    | 2    | 7    | 2     | 2     | 10    | 18   | 155   | 0     | 303   | 0     | 0    | 0     | 0    | 0     | 0     | 0     | 0    | 0     |
| [Eubacterium]_nodatum_group           | 11    | 4     | 13   | 6     | 40    | 74   | 2    | 15    | 22    | 32    | 38   | 33    | 31    | 1     | 28    | 12   | 36    | 138  | 9     | 71    | 9     | 9    | 13    |
| Erysipelatoclostridium                | 4     | 1     | 2    | 1     | 2     | 24   | 1    | 2     | 66    | 47    | 13   | 9     | 12    | 26    | 14    | 172  | 66    | 51   | 9     | 17    | 1     | 10   | 22    |
| Ruminococcaceae_NK4A224_group         | 3     | 2     | 3    | 0     | 10    | 0    | 7    | 1     | 3     | 6     | 3    | 2     | 0     | 19    | 3     | 1    | 3     | 481  | 0     | 2     | 2     | 1    | 3     |
| Enterorhabdus                         | 19    | 5     | 51   | 31    | 28    | 78   | 1    | 9     | 11    | 61    | 18   | 87    | 15    | 10    | 35    | 8    | 7     | 5    | 3     | 2     | 10    | 19   | 12    |
| Peptococcus                           | 19    | 33    | 7    | 32    | 12    | 1    | 28   | 13    | 4     | 95    | 14   | 1     | 2     | 46    | 11    | 7    | 2     | 14   | 40    | 1     | 15    | 52   | 49    |
| Lachnospiraceae_UCG-010               | 0     | 0     | 0    | 0     | 0     | 0    | 0    | 0     | 0     | 0     | 0    | 0     | 0     | 0     | 0     | 0    | 0     | 494  | 0     | 0     | 0     | 0    | 0     |

|                                               |    |    |    |    |    |    |     |     |    |     |     |    |     |    |     |    |     |     |    |    |    |    |    |
|-----------------------------------------------|----|----|----|----|----|----|-----|-----|----|-----|-----|----|-----|----|-----|----|-----|-----|----|----|----|----|----|
| <i>Lachnospiraceae_FCS020_group</i>           | 6  | 11 | 49 | 43 | 33 | 8  | 21  | 20  | 7  | 18  | 13  | 0  | 7   | 16 | 15  | 4  | 2   | 21  | 50 | 2  | 19 | 40 | 83 |
| <i>Mycoplasma</i>                             | 0  | 0  | 0  | 4  | 0  | 0  | 0   | 0   | 5  | 1   | 0   | 0  | 287 | 0  | 134 | 0  | 0   | 2   | 0  | 0  | 0  | 0  | 0  |
| <i>Moraxellaceae</i>                          | 0  | 0  | 0  | 0  | 0  | 0  | 0   | 0   | 0  | 0   | 0   | 38 | 0   | 0  | 0   | 18 | 264 | 9   | 7  | 13 | 0  | 8  | 22 |
| <i>Family_XII_UCG-001</i>                     | 17 | 1  | 19 | 39 | 13 | 2  | 13  | 6   | 10 | 22  | 14  | 11 | 0   | 23 | 34  | 5  | 1   | 3   | 45 | 1  | 14 | 10 | 10 |
| <i>Butyrivibrionaceae</i>                     | 0  | 0  | 0  | 0  | 0  | 0  | 0   | 0   | 0  | 0   | 301 | 0  | 0   | 0  | 0   | 1  | 0   | 0   | 0  | 0  | 0  | 0  | 0  |
| <i>mouse_group_meningitidis</i>               | 0  | 0  | 18 | 2  | 0  | 1  | 154 | 13  | 26 | 5   | 65  | 2  | 0   | 0  | 0   | 0  | 0   | 0   | 0  | 0  | 0  | 0  | 0  |
| <i>[Bacteroides]_pectinophilus_group</i>      | 0  | 0  | 0  | 0  | 0  | 0  | 0   | 205 | 0  | 23  | 0   | 0  | 0   | 0  | 0   | 0  | 0   | 0   | 0  | 0  | 0  | 0  | 0  |
| <i>[Eubacterium]_brachycorymbaculum_group</i> | 19 | 2  | 15 | 14 | 11 | 5  | 0   | 1   | 16 | 22  | 25  | 44 | 1   | 6  | 10  | 2  | 1   | 10  | 1  | 3  | 0  | 4  | 3  |
| <i>Candidatus_Arthronomitus</i>               | 0  | 0  | 0  | 0  | 0  | 0  | 0   | 10  | 5  | 105 | 4   | 0  | 22  | 0  | 0   | 6  | 0   | 5   | 1  | 42 | 1  | 1  | 7  |
| <i>Oryzomyces</i>                             | 1  | 5  | 2  | 12 | 0  | 1  | 6   | 11  | 0  | 7   | 2   | 8  | 0   | 1  | 0   | 0  | 0   | 3   | 80 | 0  | 0  | 8  | 2  |
| <i>Christensenellaceae_R-7_group</i>          | 0  | 0  | 7  | 0  | 6  | 5  | 0   | 3   | 12 | 2   | 14  | 0  | 5   | 0  | 8   | 0  | 0   | 16  | 0  | 43 | 7  | 6  | 7  |
| <i>Subdoligranulum</i>                        | 0  | 0  | 0  | 0  | 0  | 0  | 0   | 0   | 0  | 0   | 0   | 0  | 0   | 0  | 0   | 0  | 0   | 132 | 0  | 0  | 0  | 0  | 0  |
| <i>Bifidobacterium</i>                        | 1  | 14 | 2  | 2  | 1  | 0  | 1   | 2   | 0  | 6   | 2   | 1  | 0   | 21 | 10  | 16 | 3   | 6   | 4  | 0  | 7  | 14 | 7  |
| <i>Candidatus_Stoqerichus</i>                 | 0  | 0  | 0  | 1  | 0  | 0  | 0   | 0   | 47 | 1   | 0   | 0  | 7   | 0  | 17  | 7  | 3   | 17  | 0  | 0  | 0  | 0  | 1  |
| <i>Ureaplasma</i>                             | 0  | 0  | 5  | 0  | 1  | 1  | 0   | 2   | 6  | 0   | 0   | 0  | 0   | 15 | 2   | 21 | 1   | 0   | 2  | 20 | 0  | 1  | 3  |
| <i>Family_XII_UCG-010</i>                     | 0  | 9  | 6  | 2  | 10 | 16 | 0   | 10  | 0  | 0   | 5   | 0  | 0   | 0  | 0   | 0  | 0   | 0   | 0  | 3  | 0  | 2  | 6  |
| <i>[Eubacterium]_ventriosum_group</i>         | 0  | 0  | 7  | 1  | 6  | 8  | 0   | 2   | 4  | 4   | 0   | 1  | 0   | 0  | 0   | 0  | 0   | 3   | 0  | 11 | 0  | 0  | 0  |
| <i>Ruminococcaceae_UCG-010</i>                | 0  | 0  | 1  | 1  | 2  | 1  | 0   | 2   | 1  | 0   | 9   | 0  | 0   | 0  | 0   | 0  | 0   | 0   | 0  | 3  | 0  | 1  | 0  |
| <i>Candidatus_Soleiferrea</i>                 | 0  | 0  | 5  | 0  | 0  | 5  | 0   | 1   | 0  | 0   | 0   | 0  | 0   | 0  | 0   | 0  | 0   | 0   | 0  | 1  | 0  | 1  | 0  |
| <i>Pasteurella</i>                            | 0  | 7  | 0  | 0  | 1  | 0  | 2   | 0   | 0  | 0   | 0   | 0  | 0   | 0  | 0   | 0  | 0   | 0   | 0  | 0  | 0  | 0  | 0  |
| <i>Hydrogenobacterium</i>                     | 0  | 0  | 0  | 0  | 0  | 6  | 0   | 0   | 0  | 0   | 0   | 0  | 0   | 0  | 0   | 0  | 0   | 0   | 0  | 0  | 0  | 0  | 0  |
| <i>Hydrogenobacterium</i>                     | 0  | 0  | 0  | 0  | 1  | 0  | 0   | 0   | 0  | 0   | 1   | 0  | 0   | 0  | 0   | 0  | 0   | 1   | 0  | 0  | 0  | 1  | 0  |
